# Supplementary material for: Neutralization of Clostridium difficile toxin B with VHH-Fc fusions targeting the delivery and CROPs domains
Source: PubMed Central journal article supplement (PMC6291252; doi:10.1371/journal.pone.0208978), 2018-12-12
Supplement: pone.0208978.s006.pdf [file pone.0208978.s006.pdf]

**S1 Table: Clonal relatedness of TcdB-specific V<sub>H</sub>Hs isolated in this study.**

| Epitope bin | Clone group | V <sub>H</sub> H                                        | CDR3 length | Comment                                                                                |
|-------------|-------------|---------------------------------------------------------|-------------|----------------------------------------------------------------------------------------|
| 1           | a           | B35                                                     | 17          |                                                                                        |
|             | b           | B39                                                     | 16          | B39 and B45 differ at 1 position in CDR2 and 1 position in CDR3                        |
| B45         |             | 16                                                      |             |                                                                                        |
| 2           | c           | B54                                                     | 19          | B54 and B99 differ at 1 position in CDR3                                               |
|             |             | B99                                                     | 19          |                                                                                        |
|             | d           | B85                                                     | 19          | B85 and B167 differ at 1 position in CDR3                                              |
|             |             | B167                                                    | 19          |                                                                                        |
| 3           | e           | B48                                                     | 20          |                                                                                        |
|             |             | B52                                                     | 20          | #Differs at 1 position in CDR1 and 2 positions in CDR3                                 |
|             |             | B53                                                     | 20          | #Differs at 1 position in CDR1, 1 position in CDR2 and 3 positions in CDR3             |
|             |             | B73                                                     | 20          | #Differs at 1 position in CDR1 and 2 positions in CDR3                                 |
|             |             | B74                                                     | 20          | #Differs at 2 positions in CDR1 and 2 positions in CDR3                                |
|             |             | B79                                                     | 20          | #Differs at 2 positions in CDR1 and 3 positions in CDR3                                |
|             |             | B86                                                     | 20          | #Differs at 1 position in CDR1 and 3 positions in CDR3                                 |
|             |             | B95                                                     | 20          | #Differs at 1 position in CDR1 and 3 positions in CDR3                                 |
| B158        | 20          | #Differs at 2 positions in CDR1 and 3 positions in CDR3 |             |                                                                                        |
| 4           | f           | B26                                                     | 22          | B26 and B94 differ at 2 positions in CDR1 and 3 positions in CDR3                      |
|             |             | B94                                                     | 22          |                                                                                        |
| 5           | g           | B69                                                     | 18          |                                                                                        |
| 6           | h           | B71                                                     | 20          |                                                                                        |
| 7           | i           | B131                                                    | 16          |                                                                                        |
| n.d.        | j           | B92                                                     | 22          | B92 and B149 differ at 3 positions in CDR1, 5 positions in CDR2 and 1 position in CDR3 |
|             |             | B149                                                    | 22          |                                                                                        |
| n.d.        | k           | B46                                                     | 17          |                                                                                        |
| n.d.        | l           | B55                                                     | 16          |                                                                                        |
| n.d.        | m           | B56                                                     | 8           |                                                                                        |
| n.d.        | n           | B65                                                     | 18          |                                                                                        |
| n.d.        | o           | B76                                                     | 19          |                                                                                        |
| n.d.        | p           | B96                                                     | 22          |                                                                                        |

CDRs are defined according to IMGT ([www.imgt.org](http://www.imgt.org))

#relative to B48 V<sub>H</sub>H
