# Supplementary material for: Neutralization of Clostridium difficile toxin B with VHH-Fc fusions targeting the delivery and CROPs domains
Source: PubMed Central journal article supplement (PMC6291252; doi:10.1371/journal.pone.0208978), 2018-12-12
Supplement: pone.0208978.s007.pdf [file pone.0208978.s007.pdf]

**Table S2: Select pairs of V<sub>HH</sub>-Fc with the highest TcdB neutralization.**

| V <sub>HH</sub> -Fc 1 | V <sub>HH</sub> -Fc 2 | Epitope bins | Maximum TcdB neutralization (%) <sup>a,b</sup> |
|-----------------------|-----------------------|--------------|------------------------------------------------|
| B69-hFc               | B74-hFc               | 5 + 3        | 32.3 ± 4.8                                     |
| B69-hFc               | B94-hFc               | 5 + 4        | 51.6 ± 22.4                                    |
| B69-hFc               | B167-hFc              | 5 + 2        | 40.7 ± 11.2                                    |
| B74-hFc               | B94-hFc               | 3 + 4        | 43.6 ± 11.6                                    |
| B74-hFc               | B167-hFc              | 3 + 2        | 40.2 ± 7.5                                     |
| B94-hFc               | B131-hFc              | 4 + 7        | 50.2 ± 18.3                                    |
| B94-hFc               | B167-hFc              | 4 + 2        | 76.2 ± 15.8                                    |
| B131-hFc              | B167-hFc              | 7 + 2        | 47.7 ± 20.8                                    |
| B69-cFc               | B94-cFc               | 5 + 4        | 55.6 ± 5.1                                     |
| B71-cFc               | B94-cFc               | 6 + 4        | 39.5 ± 1.7                                     |
| B74-cFc               | B94-cFc               | 3 + 4        | 41.4 ± 3.3                                     |
| B94-cFc               | B131-cFc              | 4 + 7        | 55.9 ± 7.5                                     |
| B94-cFc               | B167-cFc              | 4 + 2        | 58.6 ± 2.7                                     |
| MDX-1388 <sup>c</sup> |                       |              | 70.7 ± 13.9                                    |

<sup>a</sup>(mean ± SD)

<sup>b</sup>125 nM V<sub>HH</sub>-Fc 1 + 125 nM V<sub>HH</sub>-Fc 2 + 500 fM TcdB vero cell cytotoxicity (72 h)

<sup>c</sup>250 nM of mAb.
